# Supplementary material for: AMPK-independent inhibition of human macrophage ER stress response by AICAR
Source: PubMed Central journal article supplement (PMC4999824; doi:10.1038/srep32111), 2016-08-26
Supplement: srep32111-s1.pdf [file srep32111-s1.pdf]

**AMPK-independent inhibition of human macrophage ER stress response by AICAR.**

Marcel Boß, Yvette Newbatt, Sahil Gupta, Ian Collins, Bernhard Brüne, and Dmitry Namgaladze

# Figure S1

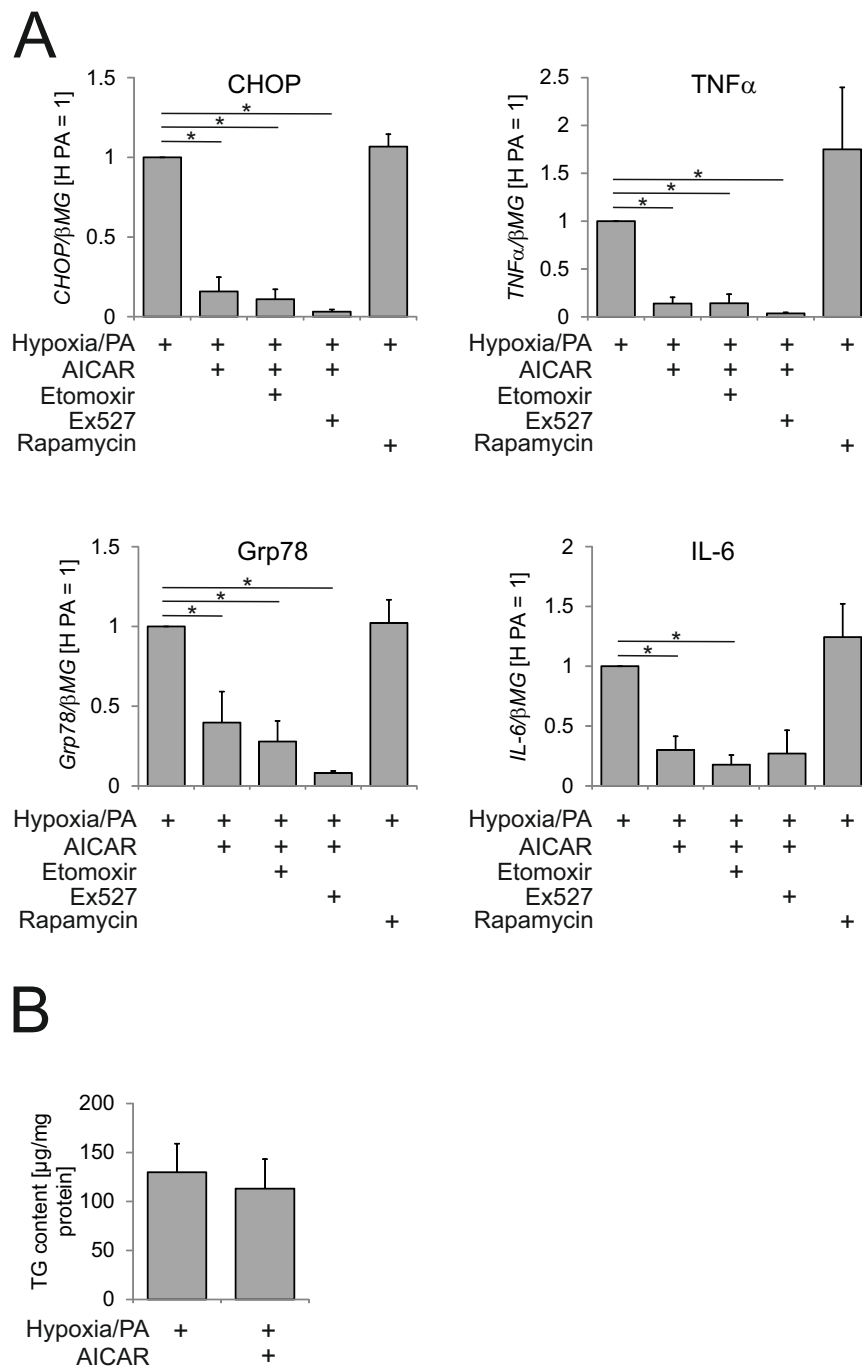

**Supplementary Figure S1**

(A) mRNA expression of genes in hypoxic macrophages treated for 24 h with palmitate in the presence of the indicated compounds. (B) Triglyceride content of hypoxic macrophages treated for 24 h with palmitate and AICAR. \*, p<0.05.

# AMPK-independent inhibition of human macrophage ER stress response by AICAR.

Marcel Boß, Yvette Newbatt, Sahil Gupta, Ian Collins, Bernhard Brüne, and Dmitry Namgaladze

## Figure S2

A

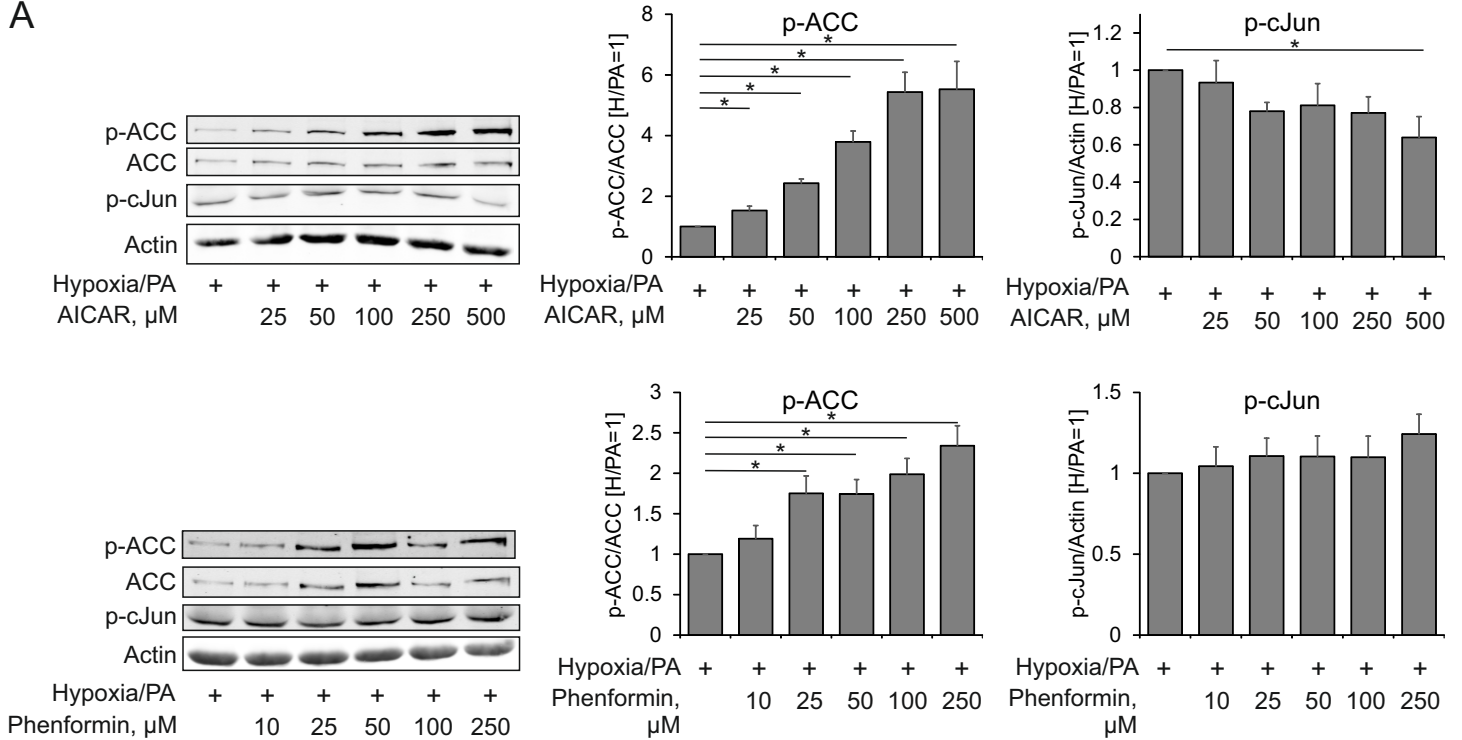

B

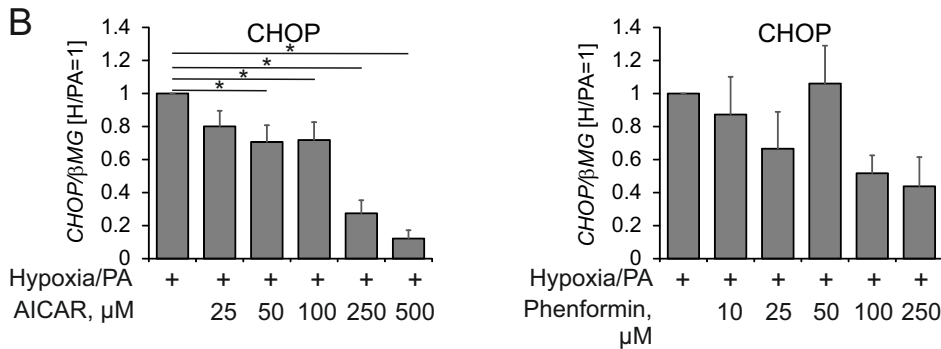

### Supplementary Figure S2

(A) Western analysis and (B) mRNA expression of CHOP in hypoxic macrophages treated for 24 h with palmitate in the presence of the indicated concentrations of AICAR and phenformin. \*, p < 0.05.
